# Supplementary material for: Hypertension in a rural community in South Africa: what they know, what they think they know and what they recommend
Source: BMC Public Health. 2019 Mar 25;19:341. doi: 10.1186/s12889-019-6642-3 (PMC6434617; doi:10.1186/s12889-019-6642-3)
Supplement: Supplementary file 1 — Hypertension perception questionnaire. This is the questionnaire used for the quantitative part in this study (PDF 44 kb) [file 12889_2019_6642_MOESM1_ESM.pdf]

# Hypertension perception questionnaire

Study ID

---

Date

---

Heart study ID Number

---

(Heart study ID )

Qx1 Have you ever been informed by a medical practitioner or nurse that you have high blood pressure?

- ☐ yes  
☐ no  
☐ don't know

Qx2 Are you taking medication for your high blood pressure?

- ☐ yes  
☐ no  
☐ don't know  
(if yes for qx1)

Qx2a How often do you take your treatment?

- ☐ Daily  
☐ 5-7 days a week  
☐ 3-5 days a week  
☐ 1-3 days a week  
☐ 1 day a week  
☐ less often  
☐ don't know

Qx3 Has a medical practitioner or a nurse discussed life style changes (e.g. changing your diet, quit smoking, exercise more) with you?

- ☐ yes, please specify  
☐ no  
☐ don't know  
(if yes for qx1)

Life style changes advised

---

Qx3a Do you adhere to the life style advice / changes?

- ☐ yes fully  
☐ yes partly  
☐ no  
☐ don't know  
(if yes for qx3)

Qx4 Do you think your chances of getting a disease of your heart or blood vessels (like stroke or a heart attack) are

- ☐ very high  
☐ high  
☐ moderate  
☐ low  
☐ very low  
☐ don't know

Qx5 Has anyone in your direct family ever been diagnosed with high blood pressure?

- ☐ Mother  
☐ Father  
☐ Sister, please specify how many  
☐ Brother, please specify how many  
☐ Daughter, please specify how many  
☐ Son, please specify how many  
☐ Grandmother  
☐ Grandfather  
☐ Grandchildren, please specify how many  
☐ No one  
☐ Don't know

Direct family with high blood pressure

Qx6 Do you know anyone in your surrounding, other than your family, who has been diagnosed with high blood pressure?

- 
- ☐ yes (please specify)  
☐ no  
☐ don't know

People with HBP in surroundings

Qx7 How well informed do you think you are about high blood pressure?

- 
- ☐ very well  
☐ well  
☐ moderate  
☐ low  
☐ very low  
☐ don't know

---

**Qx8 Do you think the following factors influence the risk of getting high blood pressure?**

|                     | yes                   | no                    | don't know            |
|---------------------|-----------------------|-----------------------|-----------------------|
| Physical exercise   | <input type="radio"/> | <input type="radio"/> | <input type="radio"/> |
| Smoking             | <input type="radio"/> | <input type="radio"/> | <input type="radio"/> |
| Diet                | <input type="radio"/> | <input type="radio"/> | <input type="radio"/> |
| Stress              | <input type="radio"/> | <input type="radio"/> | <input type="radio"/> |
| Religion            | <input type="radio"/> | <input type="radio"/> | <input type="radio"/> |
| Family History      | <input type="radio"/> | <input type="radio"/> | <input type="radio"/> |
| Alcohol Consumption | <input type="radio"/> | <input type="radio"/> | <input type="radio"/> |
| Gender              | <input type="radio"/> | <input type="radio"/> | <input type="radio"/> |
| The weather         | <input type="radio"/> | <input type="radio"/> | <input type="radio"/> |
| Salt Intake         | <input type="radio"/> | <input type="radio"/> | <input type="radio"/> |
| Pregnancy           | <input type="radio"/> | <input type="radio"/> | <input type="radio"/> |

---

**Qx9 Are the following statements true or false?**

---

|                                                                                               | true                  | false                 |
|-----------------------------------------------------------------------------------------------|-----------------------|-----------------------|
| Having high blood pressure is bad for you                                                     | <input type="radio"/> | <input type="radio"/> |
| Frequent consumption of fast food (like KFC) can result in an increase in your blood pressure | <input type="radio"/> | <input type="radio"/> |
| Kitchen salt (sodium) increases your blood pressure                                           | <input type="radio"/> | <input type="radio"/> |
| Drinking of alcohol increases your blood pressure                                             | <input type="radio"/> | <input type="radio"/> |
| Blood pressure gets better by a healthy diet                                                  | <input type="radio"/> | <input type="radio"/> |
| Blood pressure gets better by exercise                                                        | <input type="radio"/> | <input type="radio"/> |
| Blood pressure can be managed by going to church                                              | <input type="radio"/> | <input type="radio"/> |
| Blood pressure can be managed by praying                                                      | <input type="radio"/> | <input type="radio"/> |
| Blood pressure can be managed by going to the traditional healer                              | <input type="radio"/> | <input type="radio"/> |
| High blood pressure makes you feel sick                                                       | <input type="radio"/> | <input type="radio"/> |
| High blood pressure is a rare condition                                                       | <input type="radio"/> | <input type="radio"/> |
| High blood pressure prevents the development of heart disease                                 | <input type="radio"/> | <input type="radio"/> |
| High blood pressure increases the risk of a stroke                                            | <input type="radio"/> | <input type="radio"/> |
| If you ignore it, high blood pressure will go away on its own                                 | <input type="radio"/> | <input type="radio"/> |
